# Supplementary material for: High-protein high-konjac glucomannan diets changed glucose and lipid metabolism by modulating colonic microflora and bile acid profiles in healthy mouse models
Source: Royal Society of Chemistry journal article supplement (doi:10.1039/d4fo00159a), 2024-01-01
Supplement: d4fo00159a1.xlsx [file d4fo00159a1.xlsx]

## Sheet: BW
group	Flevel	Plevel	Flevel*Plevel	Animalno	cage	BW0	BW1	gain1	BW2	gain2	BW3	gain3	BW4	gain4	BW5	gain5	BW6	gain6	BW7	gain7	BW8	gain8	Glucose injection mL
CON	low	low	LFLP	1	1	15.2	15.4	0.2	15.7	0.3	16.9	1.2	16.2	-0.7	16.7	0.5	17	0.3	17	0	18	1
CON	low	low	LFLP	2	1	15.9	16.5	0.6	16.2	-0.3	17.1	0.9	17.3	0.2	17.8	0.5	18.6	0.8	18.9	0.3	18.8	-0.1	0.752
CON	low	low	LFLP	3	2	15.9	17.2	1.3	17.5	0.3	16.9	-0.6	18.6	1.7	19.3	0.7	19.6	0.3	19.1	-0.5	18.9	-0.2
CON	low	low	LFLP	4	2	16.4	16.5	0.1	17.2	0.7	17.1	-0.1	17.8	0.7	18.6	0.8	18.2	-0.4	19.2	1	18.8	-0.4	0.752
CON	low	low	LFLP	5	3	15.5	16.1	0.6	16.1	0	16.5	0.4	17.1	0.6	17.3	0.2	17.8	0.5	18.3	0.5	18	-0.3
CON	low	low	LFLP	6	3	17	17.5	0.5	16.8	-0.7	18	1.2	18.1	0.1	18.6	0.5	19.7	1.1	19.4	-0.3	19.8	0.4	0.792
CON	low	low	LFLP	7	4	19.3	21.4	2.1	21.9	0.5	22	0.1	22.6	0.6	23.4	0.8	24.1	0.7	23.7	-0.4	23.7	0
CON	low	low	LFLP	8	4	19.2	21.5	2.3	23.5	2	23.3	-0.2	23.5	0.2	24.1	0.6	25.3	1.2	25.4	0.1	25	-0.4	1
CON	low	low	LFLP	9	5	19.1	20.8	1.7	22.2	1.4	23.2	1	23.6	0.4	25.1	1.5	25.9	0.8	26.5	0.6	26.5	0
CON	low	low	LFLP	10	5	20	21.9	1.9	23.5	1.6	23.6	0.1	25.4	1.8	26.1	0.7	25.9	-0.2	26.2	0.3	27.3	1.1	1.092
CON	low	low	LFLP	11	6	18.6	20	1.4	21.2	1.2	20.8	-0.4	21.7	0.9	21.9	0.2	22.4	0.5	23.2	0.8	23.5	0.3
CON	low	low	LFLP	12	6	18.9	21.2	2.3	22.2	1	22.6	0.4	22.8	0.2	23.3	0.5	23.4	0.1	23.8	0.4	24	0.2	0.96
CON	low	low	LFLP	13	7	15.3	15.8	0.5	16.3	0.5	16.9	0.6	17.2	0.3	18.5	1.3	18.3	-0.2	18.1	-0.2	18	-0.1
CON	low	low	LFLP	14	7	16.7	16.5	-0.2	16.8	0.3	17.7	0.9	17.7	0	18.6	0.9	19.1	0.5	19	-0.1	19.3	0.3	0.772
CON	low	low	LFLP	15	8	19.1	20.1	1	20.5	0.4
CON	low	low	LFLP	16	8	15.9	20.4	4.5	22	1.6
HP	low	high	LFHP	15	8						20.8	0.3	21.1	0.3	22	0.9	23	1	23.1	0.1	23	-0.1
HP	low	high	LFHP	16	8						23.4	1.4	24.5	1.1	24.7	0.2	25.3	0.6	25.5	0.2	25	-0.5	1
HP	low	high	LFHP	17	9	16.5	16.9	0.4	17.7	0.8	17.4	-0.3	18.1	0.7	18.8	0.7	19.2	0.4	19.7	0.5	19.8	0.1
HP	low	high	LFHP	18	9	16.4	17	0.6	17.6	0.6	18.5	0.9	18.1	-0.4	18.8	0.7	18.9	0.1	19.8	0.9	19.7	-0.1	0.788
HP	low	high	LFHP	19	10	18.5	20.4	1.9	21.9	1.5	23	1.1	23.6	0.6	24.2	0.6	25.2	1	25.2	0	26.1	0.9
HP	low	high	LFHP	20	10	19.7	22.3	2.6	22.6	0.3	24	1.4	25.2	1.2	25.9	0.7	26.7	0.8	27.3	0.6	29	1.7	1.16
HP	low	high	LFHP	21	11	16.9	16.8	-0.1	17.1	0.3	17.5	0.4	16.8	-0.7	17.6	0.8	17.8	0.2	17.9	0.1	18.4	0.5
HP	low	high	LFHP	22	11	15.7	15.5	-0.2	15.7	0.2	16.6	0.9	17.3	0.7	17.1	-0.2	17.4	0.3	17.8	0.4	18.3	0.5	0.732
HP	low	high	LFHP	23	12	16	16.7	0.7	17	0.3	17.6	0.6	16.9	-0.7	17.5	0.6	18.5	1	19	0.5	19	0
HP	low	high	LFHP	24	12	17.7	18.1	0.4	18.6	0.5	19.1	0.5	18.2	-0.9	19.4	1.2	19.8	0.4	20.6	0.8	20.3	-0.3	0.812
HP	low	high	LFHP	25	13	18.7	21.2	2.5	22.8	1.6	23.3	0.5	24.3	1	24.4	0.1	24.7	0.3	24.8	0.1	25.4	0.6
HP	low	high	LFHP	26	13	13.2	11.8	-1.4
HP	low	high	LFHP	27	14	18.2	20	1.8	22.1	2.1	24.3	2.2	24.5	0.2	25.6	1.1	26	0.4	26.4	0.4	26.7	0.3
HP	low	high	LFHP	28	14	20	22.4	2.4	23.2	0.8	24.7	1.5	24.8	0.1	25.8	1	26	0.2	26.4	0.4	27	0.6	1.08
HF	high	low	HFLP	29	15	16.5	18	1.5	18.7	0.7	19.1	0.4	19.3	0.2	19.5	0.2	20.4	0.9	20.8	0.4	20.9	0.1
HF	high	low	HFLP	30	15	15.4	16.3	0.9	16.4	0.1	16.9	0.5	17.2	0.3	18.1	0.9	18	-0.1	18.3	0.3	18.5	0.2	0.74
HF	high	low	HFLP	31	16	15.4	17	1.6	16.9	-0.1	17.8	0.9	18	0.2	18	0	19.1	1.1	19.1	0	19.6	0.5
HF	high	low	HFLP	32	16	15.1	15.8	0.7	16	0.2	16.3	0.3	16.1	-0.2	16.9	0.8	17.6	0.7	17.9	0.3	18.4	0.5	0.736
HF	high	low	HFLP	33	17	17	18	1	18.3	0.3	19.5	1.2	19.2	-0.3	19.9	0.7	20.4	0.5	20.8	0.4	21.2	0.4
HF	high	low	HFLP	34	17	16.3	17.3	1	17.9	0.6	18.1	0.2	17.9	-0.2	18.8	0.9	19.2	0.4	19.3	0.1	19.4	0.1	0.776
HF	high	low	HFLP	35	18	18.2	19.4	1.2	20.1	0.7	21.4	1.3	22.1	0.7	23.5	1.4	23.9	0.4	23.9	0	24.2	0.3
HF	high	low	HFLP	36	18	18.9	21.1	2.2	22.2	1.1	23.1	0.9	23.7	0.6	24.8	1.1	24.7	-0.1	25.2	0.5	26.2	1	1.048
HF	high	low	HFLP	37	19	19.7	22.3	2.6	23.8	1.5	24.3	0.5	24.4	0.1	25.3	0.9	26.2	0.9	26.3	0.1	26.5	0.2
HF	high	low	HFLP	38	19	18.6	19.2	0.6	20	0.8	20.3	0.3	20.7	0.4	22.1	1.4	23.6	1.5	23.6	0	24	0.4	0.96
HF	high	low	HFLP	39	20	18.5	20.4	1.9	20.8	0.4	21.6	0.8	21.5	-0.1	22.3	0.8	23	0.7	24.3	1.3	25.3	1
HF	high	low	HFLP	40	20	19.1	22.5	3.4	23.4	0.9	24.2	0.8	24.5	0.3	25.7	1.2	26.5	0.8	27.1	0.6	28.2	1.1	1.128
HPHF	high	high	HFHP	41	21	16.8	17.4	0.6	17.8	0.4	17.9	0.1	18.8	0.9	18.7	-0.1	19.5	0.8	19.4	-0.1	19.8	0.4
HPHF	high	high	HFHP	42	21	15.8	16.4	0.6	16.1	-0.3	16.7	0.6	17.3	0.6	18.3	1	18.8	0.5	19.1	0.3	18.6	-0.5	0.744
HPHF	high	high	HFHP	43	22	16.7	16.8	0.1	17.4	0.6	18.3	0.9	18.3	0	18.8	0.5	19.3	0.5	19.6	0.3	19.3	-0.3
HPHF	high	high	HFHP	44	22	15.6	16.2	0.6	16.2	0	16.8	0.6	17.5	0.7	17.8	0.3	18.2	0.4	18.2	0	18	-0.2	0.72
HPHF	high	high	HFHP	45	23	15.5	16.3	0.8	16	-0.3	16.5	0.5	16.3	-0.2	17.4	1.1	17.4	0	18	0.6	17.5	-0.5
HPHF	high	high	HFHP	46	23	16.2	17.9	1.7	18.6	0.7	19	0.4	19.3	0.3	20.7	1.4	21.4	0.7	20.9	-0.5	22.3	1.4	0.892
HPHF	high	high	HFHP	47	24	19.1	21.8	2.7	23.6	1.8	24.4	0.8	24.4	0	25.9	1.5	26.3	0.4	26.9	0.6	27.4	0.5
HPHF	high	high	HFHP	48	24	18.7	21	2.3	21.9	0.9	22.7	0.8	22.9	0.2	24	1.1	24.8	0.8	25.3	0.5	25.4	0.1	1.016
HPHF	high	high	HFHP	49	25	17.7	19.9	2.2	19.8	-0.1	20.7	0.9	21.8	1.1	23.5	1.7	24.2	0.7	24.9	0.7	25.4	0.5
HPHF	high	high	HFHP	50	25	17.9	19.7	1.8	20	0.3	20.6	0.6	20.9	0.3	22.5	1.6	22.9	0.4	23.4	0.5	23.4	0	0.936
HPHF	high	high	HFHP	51	26	18	18.9	0.9	18.5	-0.4	19.1	0.6	19.9	0.8	20.3	0.4	21.1	0.8	22	0.9	22.8	0.8
HPHF	high	high	HFHP	52	26	18.8	21.8	3	22.6	0.8	23.7	1.1	24.1	0.4	25.2	1.1	25.9	0.7	26.4	0.5	26.3	-0.1	1.052

## Sheet: Feedintake
group	Flevel	Plevel	Flevel*Plevel	cage	protein content	fiber content	feedgiven1	leftover1	feedintake1	leftover2	feedintake2	feed given2	leftover3	feedintake3	feed given3	leftover4	feedintake4	leftover5	feedintake5	leftover6	feedintake6	leftover7	feedintake7	leftover8	feedintake8	proteinintake1	fiberintake1	proteinintake2	fiberintake2	proteinintake3	fiberintake3	proteinintake4	fiberintake4	proteinintake5	fiberintake5	proteinintake6	fiberintake6	proteinintake7	fiberintake7	proteinintake8	fiberintake8
CON	low	low	LFLP	1	0.2	0.05	150	104.2	22.9	75.2	14.5	60	25.7	17.15	60	30.6	14.7	30.5	14.75	28.5	15.75	27.6	16.2	30.7	14.65	4.58	1.145	2.9	0.725	3.43	0.8575	2.94	0.735	2.95	0.7375	3.15	0.7875	3.24	0.81	2.93	0.7325
CON	low	low	LFLP	2	0.2	0.05	150	99.6	25.2	66.2	16.7	60	26.8	16.6	60	22.9	18.55	23.9	18.05	25.5	17.25	21.9	19.05	27.8	16.1	5.04	1.26	3.34	0.835	3.32	0.83	3.71	0.9275	3.61	0.9025	3.45	0.8625	3.81	0.9525	3.22	0.805
CON	low	low	LFLP	3	0.2	0.05	150	105	22.5	73.7	15.65	60	22.7	18.65	60	21.9	19.05	29.5	15.25	25.6	17.2	23.4	18.3	28.1	15.95	4.5	1.125	3.13	0.7825	3.73	0.9325	3.81	0.9525	3.05	0.7625	3.44	0.86	3.66	0.915	3.19	0.7975
CON	low	low	LFLP	4	0.2	0.05	150	103.4	23.3	66.6	18.4	60	18.9	20.55	60	20.8	19.6	21.5	19.25	22.6	18.7	22.3	18.85	27.5	16.25	4.66	1.165	3.68	0.92	4.11	1.0275	3.92	0.98	3.85	0.9625	3.74	0.935	3.77	0.9425	3.25	0.8125
CON	low	low	LFLP	5	0.2	0.05	150	99	25.5	61.8	18.6	60	19.3	20.35	60	18.8	20.6	17.5	21.25	17.5	21.25	14	23	19.8	20.1	5.1	1.275	3.72	0.93	4.07	1.0175	4.12	1.03	4.25	1.0625	4.25	1.0625	4.6	1.15	4.02	1.005
CON	low	low	LFLP	6	0.2	0.05	150	101.2	24.4	66.1	17.55	60	20	20	60	22.1	18.95	24.8	17.6	23.7	18.15	21.9	19.05	27.9	16.05	4.88	1.22	3.51	0.8775	4	1	3.79	0.9475	3.52	0.88	3.63	0.9075	3.81	0.9525	3.21	0.8025
CON	low	low	LFLP	7	0.2	0.05	150	107.3	21.35	75.1	16.1	60	22.5	18.75	60	26.7	16.65	24.9	17.55	27.3	16.35	24	18	28.3	15.85	4.27	1.0675	3.22	0.805	3.75	0.9375	3.33	0.8325	3.51	0.8775	3.27	0.8175	3.6	0.9	3.17	0.7925
CON	low	low	LFLP	8	0.2	0.05	150	104.9	22.55	69	17.95															4.51	1.1275	3.59	0.8975
									23.4625	69.2125	16.9312	60	22.2714	18.8643	60	23.4	18.3	24.6571	17.6714	24.3857	17.8071	22.1571	18.9214	27.1571	16.4214	4.6925	1.17312	3.38625	0.846563	3.77286	0.943214	3.66	0.915	3.53429	0.883571	3.56143	0.890357	3.78429	0.946071	3.28429	0.821071
HP	low	high	LFHP	9	0.4	0.05						60			60	18.4	20.8	21.2	19.4	20.7	19.65	19.6	20.2	22.9	18.55	0	0	0	0	0	0	8.32	1.04	7.76	0.97	7.86	0.9825	8.08	1.01	7.42	0.9275
HP	low	high	LFHP	10	0.4	0.05	150	107.3	21.35	75.2	16.05	60	23.1	18.45	60	24.6	17.7	24.5	17.75	26.2	16.9	23.8	18.1	25	17.5	8.54	1.0675	6.42	0.8025	7.38	0.9225	7.08	0.885	7.1	0.8875	6.76	0.845	7.24	0.905	7	0.875
HP	low	high	LFHP	11	0.4	0.05	150	105.1	22.45	69	18.05	60	15.1	22.45	60	17.1	21.45	18.4	20.8	16.6	21.7	16.8	21.6	16.5	21.75	8.98	1.1225	7.22	0.9025	8.98	1.1225	8.58	1.0725	8.32	1.04	8.68	1.085	8.64	1.08	8.7	1.0875
HP	low	high	LFHP	12	0.4	0.05	150	108.1	20.95	77.3	15.4	60	22.1	18.95	60	26.7	16.65	27.3	16.35	27.3	16.35	26.2	16.9	26	17	8.38	1.0475	6.16	0.77	7.58	0.9475	6.66	0.8325	6.54	0.8175	6.54	0.8175	6.76	0.845	6.8	0.85
HP	low	high	LFHP	13	0.4	0.05	150	103.8	23.1	71.3	16.25	60	24.4	17.8	60	30.9	14.55	28.9	15.55	27.8	16.1	26.8	16.6	29	15.5	9.24	1.155	6.5	0.8125	7.12	0.89	5.82	0.7275	6.22	0.7775	6.44	0.805	6.64	0.83	6.2	0.775
HP	low	high	LFHP	14	0.4	0.05	150	112.2	18.9	90.8	21.4	60	37.2	22.8	60	39.5	20.5	41.2	18.8	40	20	40.7	19.3	37.5	22.5	7.56	0.945	8.56	1.07	9.12	1.14	8.2	1.025	7.52	0.94	8	1	7.72	0.965	9	1.125
HP	low	high	LFHP	15	0.4	0.05	150	103.2	23.4	67.3	17.95	60	15.3	22.35	60	17.2	21.4	18.8	20.6	20.5	19.75	17.4	21.3	19.3	20.35	9.36	1.17	7.18	0.8975	8.94	1.1175	8.56	1.07	8.24	1.03	7.9	0.9875	8.52	1.065	8.14	1.0175
									21.6917	75.15	17.5167	60	22.8667	20.4667	60	24.9143	19.0071	25.7571	18.4643	25.5857	18.6357	24.4714	19.1429	25.1714	19.0214	7.43714	0.929643	6.00571	0.750714	7.01714	0.877143	7.60286	0.950357	7.38571	0.923214	7.45429	0.931786	7.65714	0.957143	7.60857	0.951071
HF	high	low	HFLP	16	0.18	0.2	150	104.2	22.9	72.5	15.85	60	23.5	18.25	60	27.2	16.4	28.8	15.6	25.1	17.45	24.6	17.7	28.4	15.8	4.122	4.58	2.853	3.17	3.285	3.65	2.952	3.28	2.808	3.12	3.141	3.49	3.186	3.54	2.844	3.16
HF	high	low	HFLP	17	0.18	0.2	150	106.1	21.95	73.6	16.25	60	27	16.5	60	27.1	16.45	29.4	15.3	25.5	17.25	25.9	17.05	30.7	14.65	3.951	4.39	2.925	3.25	2.97	3.3	2.961	3.29	2.754	3.06	3.105	3.45	3.069	3.41	2.637	2.93
HF	high	low	HFLP	18	0.18	0.2	150	103.8	23.1	66.3	18.75	60	22.8	18.6	60	24	18	25.2	17.4	22.5	18.75	21.8	19.1	25.5	17.25	4.158	4.62	3.375	3.75	3.348	3.72	3.24	3.6	3.132	3.48	3.375	3.75	3.438	3.82	3.105	3.45
HF	high	low	HFLP	19	0.18	0.2	150	103	23.5	65.8	18.6	60	18.4	20.8	60	18.4	20.8	18.4	20.8	16	22	17	21.5	21	19.5	4.23	4.7	3.348	3.72	3.744	4.16	3.744	4.16	3.744	4.16	3.96	4.4	3.87	4.3	3.51	3.9
HF	high	low	HFLP	20	0.18	0.2	150	101.4	24.3	63	19.2	60	19.9	20.05	60	19.3	20.35	23	18.5	16.8	21.6	16.7	21.65	22.1	18.95	4.374	4.86	3.456	3.84	3.609	4.01	3.663	4.07	3.33	3.7	3.888	4.32	3.897	4.33	3.411	3.79
HF	high	low	HFLP	21	0.18	0.2	150	102.7	23.65	64.3	19.2	60	17.2	21.4	60	22.6	18.7	22.9	18.55	17.4	21.3	16	22	19	20.5	4.257	4.73	3.456	3.84	3.852	4.28	3.366	3.74	3.339	3.71	3.834	4.26	3.96	4.4	3.69	4.1
									23.2333	67.5833	17.975	60	21.4667	19.2667	60	23.1	18.45	24.6167	17.6917	20.55	19.725	20.3333	19.8333	24.45	17.775	4.182	4.64667	3.2355	3.595	3.468	3.85333	3.321	3.69	3.1845	3.53833	3.5505	3.945	3.57	3.96667	3.1995	3.555
HPHF	high	high	HFHP	22	0.35	0.2	150	110.8	19.6	77.9	16.45	60	26.7	16.65	60	26.4	16.8	27.4	16.3	26.1	16.95	25.8	17.1	28	16	6.86	3.92	5.7575	3.29	5.8275	3.33	5.88	3.36	5.705	3.26	5.9325	3.39	5.985	3.42	5.6	3.2
HPHF	high	high	HFHP	23	0.35	0.2	150	113.9	18.05	80	16.95	60	21.8	19.1	60	18.4	20.8	25.4	17.3	23.2	18.4	24	18	26.1	16.95	6.3175	3.61	5.9325	3.39	6.685	3.82	7.28	4.16	6.055	3.46	6.44	3.68	6.3	3.6	5.9325	3.39
HPHF	high	high	HFHP	24	0.35	0.2	150	107.6	21.2	74.1	16.75	60	22.2	18.9	60	25.6	17.2	23.6	18.2	21.7	19.15	23.2	18.4	21	19.5	7.42	4.24	5.8625	3.35	6.615	3.78	6.02	3.44	6.37	3.64	6.7025	3.83	6.44	3.68	6.825	3.9
HPHF	high	high	HFHP	25	0.35	0.2	150	105.4	22.3	64.8	20.3	60	18.3	20.85	60	20.4	19.8	20.3	19.85	17.5	21.25	16.8	21.6	20.4	19.8	7.805	4.46	7.105	4.06	7.2975	4.17	6.93	3.96	6.9475	3.97	7.4375	4.25	7.56	4.32	6.93	3.96
HPHF	high	high	HFHP	26	0.35	0.2	150	107.4	21.3	71.2	18.1	60	20.2	19.9	60	19.4	20.3	18.8	20.6	17.8	21.1	16.3	21.85	20.6	19.7	7.455	4.26	6.335	3.62	6.965	3.98	7.105	4.06	7.21	4.12	7.385	4.22	7.6475	4.37	6.895	3.94
HPHF	high	high	HFHP	27	0.35	0.2	150	110.1	19.95	75.7	17.2	60	23.2	18.4	60	22.9	18.55	24.7	17.65	21.3	19.35	20.5	19.75	22.7	18.65	6.9825	3.99	6.02	3.44	6.44	3.68	6.4925	3.71	6.1775	3.53	6.7725	3.87	6.9125	3.95	6.5275	3.73
									20.4	73.95	17.625	60	22.0667	18.9667	60	22.1833	18.9083	23.3667	18.3167	21.2667	19.3667	21.1	19.45	23.1333	18.4333	7.14	4.08	6.16875	3.525	6.63833	3.79333	6.61792	3.78167	6.41083	3.66333	6.77833	3.87333	6.8075	3.89	6.45167	3.68667
备注：标记小鼠为单数，26号小鼠死亡，对照组15号、16号替换为高蛋白组

## Sheet: GI
Group	AnimalNo	Flevel	Plevel	Flevel*Plevel	min0	min15	min30	min60	min90	min120
CON	CON4	low	low	LFLP	7.1	26.6	28.5	14	10.7	9.2
CON	CON6	low	low	LFLP	4.5	25	20.3	25.4	9.7	7.7
CON	CON8	low	low	LFLP	4.4	23.5	24.1	21.3	13	9.9
CON	CON12	low	low	LFLP	5.4	26.4	31.6	23.3	13.7	9.2
CON	CON13	low	low	LFLP	4.3	24.7	24.9	14.7	8.3	5.9
HP	HP16	low	high	LFHP	5.1	22.8	19.8	12.6	7.2	6.1
HP	HP18	low	high	LFHP	6.3	24.1	28.1	14.3	10.6	8.3
HP	HP20	low	high	LFHP	8.7	23.1	31.3	28.1	16.8	12.8
HP	HP22	low	high	LFHP	7.5	26	18.2	11.6	9	8
HP	HP24	low	high	LFHP	7.8	27.9	22.5	11.7	9.6	8
HP	HP28	low	high	LFHP	7.4	31.9	27.1	17.8	13.3	10.2
HF	HF30	high	low	HFLP	6.8	13.2	10.7	9.3	8.5	8.2
HF	HF32	high	low	HFLP	4.7	20.8	18.7	14	10.1	9.4
HF	HF34	high	low	HFLP	5.7	23.8	26.5	13.7	11.7	8.9
HF	HF36	high	low	HFLP	7.3	25.9	21.1	12.3	10.6	9.6
HF	HF38	high	low	HFLP	7.5	26.1	32.4	27.9	20.6	14.5
HF	HF40	high	low	HFLP	7.7	20.5	24	16.3	12.8	11.4
HPHF	HPHF42	high	high	HFHP	3.3	29.4	26	10.2	6.6	6.4
HPHF	HPHF44	high	high	HFHP	4.3	32.7	25.8	15.9	11.3	6.8
HPHF	HPHF46	high	high	HFHP	9.1	22.8	23.5	10.5	9.5	8.7
HPHF	HPHF48	high	high	HFHP	8.9	29	23.7	16.4	10.8	12
HPHF	HPHF50	high	high	HFHP	7.4	24.4	15.7	13	10.8	10.5
HPHF	HPHF52	high	high	HFHP	7.3	29.2	29.7	21.9	19	14.7
					2g glucose/kg BW（mmol/L）
	Group				0 min	15 min	30 min	60 min	90 min	120 min
	CON				5.14	25.24	25.88	19.74	11.08	8.38
	HP				7.13333	25.9667	24.5	16.0167	11.0833	8.9
	HF				6.61667	21.7167	22.2333	15.5833	12.3833	10.3333
	HPHF				6.71667	27.9167	24.0667	14.65	11.3333	9.85

## Sheet: plasma
group	animalno	Flevel	Plevel	Flevel*Plevel	NEFA	TG	TCHO	HDL	LDL	GLU	TNFa
CON	CON1	low	low	LFLP	1.01111	1.95	4.3	1.45	2.83	5.4	376.719
CON	CON3	low	low	LFLP	0.874492	2.23	5	1.3	3.75	6.1	358.7
CON	CON5	low	low	LFLP	0.858346	2.53	4.65	1.12	3.56	5.6	438.8
CON	CON6	low	low	LFLP	1.03347	2.46	4.8	1.5	3.12	6.4	424.8
HP	HP1	low	high	LFHP	0.640996	2.2	3.9	1.05	2.76	5	476.9
HP	HP3	low	high	LFHP	0.60001	1.49	3.58	1.34	2.47	7	442.8
HP	HP5	low	high	LFHP	0.609946	1.69	4.41	1.5	2.94	7.2	468.852
HP	HP6	low	high	LFHP	0.765196	1.73	4.12	1.31	3.18	4.1	440.812
HF	HF1	high	low	HFLP	0.796246	1.7	3.9	0.86	3.03	7.3	589.025
HF	HF3	high	low	HFLP	0.735388	1.39	3.34	1.17	2.2	7	597.028
HF	HF5	high	low	HFLP	0.698128	2.07	3.68	1.41	2.32	6.7	647.124
HF	HF6	high	low	HFLP	0.58759	1.93	4.52	1.54	2.93	3.8	669.141
HPHF	HPHF1	high	high	HFHP	0.551572	1.37	3.6	1.33	2.22	3.7	701.187
HPHF	HPHF3	high	high	HFHP	0.690676	1.76	3.43	1.09	2.52	4.6	675.15
HPHF	HPHF5	high	high	HFHP	0.518038	1.51	3.82	1.43	2.1	4.1	637.095
HPHF	HPHF6	high	high	HFHP	0.598768	1.75	3.34	1.17	1.97	3.8	619.069
				unit	mmol/L	mmol/L	mmol/L	mmol/L	mmol/L	mmol/L	pg/ml
				reference range		0.45-1.81	＜5.18	1.29-1.55	＜3.37	3.9-6.1

## Sheet: BA
sample weight mg	group	Flevel	Plevel	Flevel*Plevel	animalno	alloLCA	LCA	isoLCA	NorDCA	sevenketoLCA	twelveketoLCA	ketoLCA6	betaUDCA	DCA	CDCA	UDCA	HDCA	NorCA	DHCA	diketoLCAsetw	diketoLCAsise	alphaMCA	UCA	betaMCA	CA	ACA	betaCA	GLCA	GHDCA	GCDCA	GUDCA	GDCA	LCA3S	GCA	TLCA	THDCAaTUDCA	TDCA	TCDCA	TCA	TalphaMCA	THCA	TbetaMCA	CDCAG
49.7	CON	low	low	LFLP	CON1	1.30184	48.3853	6.06472	13.9613	11.7485	70.7464	0	0	883.189	67.4209	0	258.581	16.8211	0	0	1.64192	834.541	21.9291	2071.23	1502.44	253.08	0	0	0	0	0	1.26446	0	3.16477	4.98278	8.42241	24.6683	4.25013	28.0119	15.2772	0	69.8457	0
49.6	CON	low	low	LFLP	CON2	2.63788	90.8216	12.4388	5.97398	11.7663	110.254	0	0	890.104	16.655	0	225.934	1.76903	0	0	1.04283	540.789	25.4883	1783.63	198.421	35.4717	0	0	0	0	0	2.33062	0	0	0	2.15319	7.83322	0	0	5.17628	0	13.2347	0
50.4	CON	low	low	LFLP	CON3	0	2.88568	0	1.1614	49.9782	6.23404	0	0	292.572	314.006	0	389.403	8.81714	0	0	3.70011	2066.02	60.6854	4266.08	8410.25	694.693	0	0	1.9171	2.54538	3.69751	1.40231	0	53.6231	11.3059	412.363	152.014	265.95	2741.32	3716.18	0	16883.2	0
50.4	CON	low	low	LFLP	CON4	3.74374	80.2337	6.728	0.444787	30.744	42.8012	0	0	623.113	120.619	0	241.739	0	0	0	2.24267	1048.38	20.1191	3158.83	2608.16	662.966	0	0	1.08752	1.76796	1.22172	1.29203	0	13.9022	6.6514	196.217	163.498	153.29	2268.8	2193.6	0	6395.98	0
50.3	CON	low	low	LFLP	CON5	3.04163	97.6833	8.30972	0.682263	5.86988	71.0643	0	0	820.672	8.90604	0	205.475	0	0	0	0.896758	320.314	15.0182	900.672	104.815	49.8107	0	0	0	0	0	1.03008	0	0	0	2.86883	4.37572	1.43209	5.37737	4.59601	0	11.5574	0
50.9	CON	low	low	LFLP	CON6	0	33.341	4.06311	32.9201	36.7476	43.9984	0	0	542.991	189.075	0	298.853	90.4969	0	0	1.18625	1429.32	67.4873	4307.47	6150.94	415.676	0	0	2.01938	2.41512	4.24979	1.29663	0	37.5132	11.4056	1114.99	731.176	847.054	16901	11478.8	0	38102.2	0
51	HP	low	high	LFHP	HP1	6.81039	245.032	21.1043	0.932183	5.07459	183.63	0	0	1252.25	8.06664	0	302.803	0	0	0	1.62537	645.913	9.83618	1155.97	80.2856	21.8547	0	0	0	0	0	1.22771	0	0	3.75426	4.5609	6.09474	3.23745	6.78914	5.64592	0	14.6051	0
46.4	HP	low	high	LFHP	HP2	1.62616	85.0261	7.61495	17.2227	37.5444	82.8726	0	0	809.067	235.083	0	249.373	30.7014	0	0	1.36227	1228.02	58.8533	2637.35	6040.18	302.132	0	0	1.7012	3.07349	4.04986	2.78099	0	43.2064	19.7307	1267.79	2051.82	2129.56	24746.5	16122.9	0	27898.9	0
49.6	HP	low	high	LFHP	HP3	8.14155	67.0167	9.57278	0.636724	5.38067	93.079	0	0	693.681	6.38809	0	142.209	0	0	0	1.67676	332.183	16.7859	964.534	102.762	78.9045	0	0	0	0	0	0.694611	0	0	0	2.76149	4.15598	0	6.94596	4.07674	0	15.4542	0
51.3	HP	low	high	LFHP	HP4	3.47032	223.951	15.879	8.44928	11.3486	110.698	0	0	1345.03	33.6721	0	238.966	6.64567	0	0	1.01312	931.947	21.1055	2307	273.176	86.3016	0	0	0	0	0	0.970349	0	0	0	2.31197	9.51989	0	3.70683	4.5227	0	12.4923	0
49.3	HP	low	high	LFHP	HP5	2.13362	202.34	5.55419	34.9259	17.3584	120.294	0	0	1526.2	54.5709	0	552.803	10.6376	0	7.52932	0.808171	1384.51	34.4017	3342.03	866.326	157.127	0	0	0	0	0	2.2479	12.9902	0	0	5.85015	19.8988	0	10.2557	14.2812	0	36.3365	0
49.5	HP	low	high	LFHP	HP6	3.08114	59.2532	5.08163	0.61239	2.99569	34.9232	0	0	548.935	1.72303	0	90.5609	0	0	0	0.755288	143.126	3.22408	316.782	33.4445	25.2593	0	0	0	0	0	0.749766	0	0	0	3.75316	2.93558	0	2.55395	4.58306	0	8.143	0
49.8	HF	high	low	HFLP	HF1	8.71477	101.716	8.28917	1.95926	18.2335	65.887	0	0	1050.33	50.7941	0	278.603	2.50046	0	5.40957	0.769526	951.968	169.008	1905.08	1090.23	133.45	0	0	0	0	0	1.08064	8.87737	0	0	1.90495	6.61886	0	6.23226	4.51738	0	7.2847	0
50.3	HF	high	low	HFLP	HF2	0	35.7224	0	0	8.06097	38.7287	0	0	434.667	16.1527	0	184.91	5.70694	0	4.44618	0	541.474	23.2182	534.076	359.628	117.828	0	0	0	0	0	0	0	0	0	2.06225	2.89043	0	4.74995	3.51314	0	5.43909	0
49.8	HF	high	low	HFLP	HF3	9.55682	99.2735	5.17077	1.18672	3.21705	82.0506	0	0	546.155	0	0	160.852	8.68429	0	4.26695	0	270.032	0	1166.48	7.94683	0	0	0	0	0	0	0	6.30785	0	0	1.25982	2.28181	0	2.47553	3.02651	0	5.23953	0
50.2	HF	high	low	HFLP	HF4	10.022	80.1353	10.9169	2.18669	1.98872	57.1728	0	0	569.439	0	0	372.058	0	0	0	0.79423	147.387	0	66.3034	9.42639	0	0	0	0	0	0	0.657847	0	0	0	1.13162	2.06445	0	1.34621	2.00413	0	2.19277	0
50.7	HF	high	low	HFLP	HF5	0	17.7729	0	0	3.6698	35.1464	0	0	161.104	1.92806	0	102.923	1.13663	0	2.87345	0.993235	199.366	0	257.529	11.757	40.2427	0	0	0	0	0	0	0	0	0	1.89247	0	0	3.5735	3.6585	0	6.50261	0
49.3	HF	high	low	HFLP	HF6	9.28971	52.5665	2.07535	0	6.83148	80.6357	0	0	570.511	3.5266	0	104.158	3.7631	0	4.52232	1.42918	472.466	0	607.377	60.5372	45.3329	0	0	0	0	0	0.814101	0	0	0	1.54995	4.03783	0	2.75787	5.10284	0	5.92276	0
51	HPHF	high	high	HFHP	HPHF1	9.15284	171.931	21.0875	1.1891	0	91.9199	0	0	783.993	0	0	288.696	8.97298	0	4.398	0	522.179	0	795.967	11.8459	7.31853	0	0	0	0	0	0.703802	9.52708	0	0	1.36258	2.04152	0	2.50689	2.75418	0	3.47198	0
50.5	HPHF	high	high	HFHP	HPHF2	0.97035	60.157	1.36612	0.418406	8.33554	80.224	0	0	677.639	10.3552	0	169.254	7.29037	0	3.65096	0	565.894	31.6489	789.282	437.59	79.3122	0	0	0	0	0	0.667042	7.57573	0	0	1.71935	9.24207	0	3.8794	4.65375	0	6.26921	0
50.1	HPHF	high	high	HFHP	HPHF3	8.05561	104.715	7.44994	2.26563	4.90755	53.8933	0	0	629.572	3.61336	0	171.214	17.3887	0	2.50465	0.770097	451.672	11.4856	716.873	47.2123	11.8032	0	0	0	0	0	0.685424	20.2944	0	0	1.89375	3.5808	0	3.41664	3.80678	0	5.78473	0
49.3	HPHF	high	high	HFHP	HPHF4	0	19.5483	0.935875	0	4.36145	50.9778	0	0	473.45	3.99549	0	124.406	2.44515	0	2.44531	0	444.329	12.0609	614.048	91.4811	112.392	0	0	0	0	0	0.519981	0	0	0	1.29571	2.73123	0	1.42457	3.95271	0	3.7871	0
50.6	HPHF	high	high	HFHP	HPHF5	9.26793	71.4555	11.6011	0	1.86115	44.9898	0	0	393.998	1.38558	0	72.6926	2.59688	0	3.02122	0.883203	263.86	0	847.678	4.93098	6.49855	0	0	0	0	0	0	0	0	0	1.21438	0	0	3.28335	2.37265	0	4.49481	0
50.8	HPHF	high	high	HFHP	HPHF6	6.22675	57.461	10.1853	0.450866	0.502776	46.6885	0	0	424.493	0.848641	0	68.4238	1.23144	0	3.21765	0	185.227	0	675.184	9.52322	1.80908	0	0	0	0	0	0	0	0	0	1.04106	0	0	2.66373	2.01185	0	4.01169	0
浓度（ng/ml）
					primary bile acids: 胆酸CA、鹅脱氧胆酸Chenodeoxycholic acid CDCA、甘氨胆酸N-Choloylglycine CGA、牛磺胆酸Taurocholic acid TCA、甘氨鹅脱氧胆酸Glycochenodeoxycholic acid GCDCA、牛磺鹅脱氧胆酸Taurochenodeoxycholic acidTCDCA .
缩写	全称	primary	secondary	共轭	非共轭
alloLCA	别胆酸				非共轭
LCA	石胆酸		次级胆汁酸
isoLCA	异石胆酸
NorDCA	23-脱甲胆酸
sevenketoLCA	7-酮基脱氧胆酸
twelveketoLCA	12-酮基石胆酸
ketoLCA6	6-酮基石胆酸
betaUDCA	β-熊脱氧胆酸
DCA	脱氧胆酸		次级胆汁酸		非共轭
CDCA	鹅脱氧胆酸	初级胆汁酸			非共轭
UDCA	熊脱氧胆酸		次级胆汁酸？		非共轭
HDCA	猪脱氧胆酸
NorCA	23-脱甲胆酸
DHCA	脱氢石胆酸
diketoLCAsetw	7,12-二酮基石胆酸
diketoLCAsise	6,7-二酮基石胆酸
alphaMCA	α-鼠胆酸
UCA	熊果胆酸
betaMCA	β-鼠胆酸
CA	胆酸	初级胆汁酸			非共轭
ACA	原胆酸
betaCA	3β-胆酸
GLCA	甘氨石胆酸		次级胆汁酸
GHDCA	甘氨猪脱氧胆酸
GCDCA	甘氨鹅脱氧胆酸	初级胆汁酸
GUDCA	甘氨熊脱氧胆酸
GDCA	甘氨脱氧胆酸		次级胆汁酸
LCA3S	石胆酸3s
GCA	甘氨胆酸	初级胆汁酸		共轭
TLCA	牛磺石胆酸		次级胆汁酸
THDCAaTUDCA	牛磺猪脱氧胆酸a牛磺熊脱氧胆酸
TDCA	牛磺脱氧胆酸		次级胆汁酸
TCDCA	牛磺鹅脱氧胆酸	初级胆汁酸
TCA	牛磺胆酸	初级胆汁酸		共轭
TalphaMCA	牛磺-α-鼠胆酸
THCA	三羟别胆脘酸
TbetaMCA	牛磺-β-鼠胆酸
CDCAG	鹅去氧胆酸-3β-葡萄糖醛酸

## Sheet: PCR
group	animalno	Flevel	Plevel	Flevel*Plevel	COX2	TNFa	TLR	FASN	SREBP1C	PPAR	FXR	SHP	FOXO1
CON	CON1	low	low	LFLP	0.887307	1.69379	1.02731	0.889015	1.04213	0.923185	0.905258	1.16318	0.930711
CON	CON2	low	low	LFLP	1.65561	1.03135	1.32973	0.858752	1.00467	1.14276	0.808523	0.668153	1.01593
CON	CON3	low	low	LFLP	0.824585	0.859678	1.05109	0.909155	1.07846	0.969878	1.19475	1.26422	1.26624
CON	CON4	low	low	LFLP	0.873302	0.812163	0.74002	0.919653	0.667506	0.795255	1.05219	0.783415	0.849823
CON	CON5	low	low	LFLP	0.76759	0.973326	0.828516	1.25813	1.18655	0.975214	1.08918	1.08598	1.00615
CON	CON6	low	low	LFLP	1.23152	0.842364	1.13593	1.24519	1.11817	1.26018	0.997844	1.19629	0.976824
HP	HP1	low	high	LFHP	1.51909	1.48842	0.548121	0.401646	0.948638	1.22452	0.998902	1.37733	1.12106
HP	HP2	low	high	LFHP	1.15019	1.19954	0.874584	0.356193	0.941746	1.27962	0.851165	1.07012	1.0301
HP	HP3	low	high	LFHP	1.92297	1.30463	0.21546	0.778333	1.4388	0.971931	1.28882	1.03465	2.28742
HP	HP4	low	high	LFHP	1.08478	0.915571	0.272748	0.640236	1.34964	1.41638	1.04624	1.74437	3.66225
HP	HP5	low	high	LFHP	1.62903	1.01446	0.374735	0.462585	1.02238	0.928108	1.24805	1.47302	1.09822
HP	HP6	low	high	LFHP	1.0874	1.24619	0.945449	0.547051	1.36005	1.32711	1.13187	1.07167	1.85029
HF	HF1	high	low	HFLP	1.9109	2.25996	1.31715	0.698287	1.23055	1.43387	1.38385	1.058	3.21596
HF	HF2	high	low	HFLP	1.022	3.23437	2.51253	1.17625	0.808294	1.03461	1.3283	1.09994	2.33528
HF	HF3	high	low	HFLP	1.48014	1.25507	1.36741	1.12293	1.23817	1.21503	1.16804	0.905527	2.49305
HF	HF4	high	low	HFLP	1.87237	1.28798	1.18422	0.81716	1.26331	1.06877	1.11864	1.44774	3.1502
HF	HF5	high	low	HFLP	1.02584	2.29968	2.14293	0.962561	0.870512	1.18587	1.30293	0.977848	1.37673
HF	HF6	high	low	HFLP	1.50846	1.46735	1.1312	0.732611	1.26413	1.34539	1.50878	0.826321	2.36747
HPHF	HPHF1	high	high	HFHP	1.90308	0.311899	0.383238	0.807006	0.809402	1.22825	0.731763	1.40701	2.2204
HPHF	HPHF2	high	high	HFHP	1.89881	0.641451	0.428641	0.635471	0.672255	1.05323	0.912147	1.12637	2.01054
HPHF	HPHF3	high	high	HFHP	2.74068	0.224944	0.331797	0.459056	0.651544	0.845654	0.543552	1.39944	1.48111
HPHF	HPHF4	high	high	HFHP	1.99664	0.335016	0.852011	0.450343	0.688145	0.945575	0.867367	0.66209	1.03244
HPHF	HPHF5	high	high	HFHP	1.41067	0.193675	0.265761	0.690012	0.938908	1.18468	0.835201	0.780764	1.19435
HPHF	HPHF6	high	high	HFHP	1.63799	0.214185	0.409448	0.400767	0.7102	1.20241	0.706864	0.72507	1.06128
					colon			liver

## Sheet: liver lipid content
Diet	replicate	TCHO	TG	Glycogen	Flevel	Plevel	Flevel*Plevel
CON	1	0.161276	0.619451	37.3924	low	low	LFLP
CON	2	0.316962	0.904624	33.6979	low	low	LFLP
CON	3	0.260203	1.22011	49.2127	low	low	LFLP
CON	4	0.29401	0.968743	41.6639	low	low	LFLP
CON	5	0.27704	0.647754	58.4158	low	low	LFLP
CON	6	0.261443	1.00399	34.1106	low	low	LFLP
HP	1	0.340497	1.16668	36.9843	low	high	LFHP
HP	2	0.367773	1.61673	34.1911	low	high	LFHP
HP	3	0.283397	0.793902	29.9055	low	high	LFHP
HP	4	0.22797	1.21661	37.6118	low	high	LFHP
HP	5	0.265618	1.04687	32.1451	low	high	LFHP
HP	6	0.285435	0.521108	48.2551	low	high	LFHP
HF	1	0.225169	1.12057	25.6302	high	low	HFLP
HF	2	0.302507	0.691052	35.233	high	low	HFLP
HF	3	0.270978	1.78979	32.8163	high	low	HFLP
HF	4	0.23361	0.838238	33.7744	high	low	HFLP
HF	5	0.215882	0.615104	37.8275	high	low	HFLP
HF	6	0.227583	0.696899	42.8844	high	low	HFLP
HPHF	1	0.332631	1.24212	31.1248	high	high	HFHP
HPHF	2	0.315504	0.83812	29.8287	high	high	HFHP
HPHF	3	0.268474	0.935941	24.1564	high	high	HFHP
HPHF	4	0.250815	0.589088	41.0986	high	high	HFHP
HPHF	5	0.196242	0.658993	38.3281	high	high	HFHP
HPHF	6	0.28326	0.57238	40.3431	high	high	HFHP
		mmol/gprot	mmol/gprot	mg/gliver

## Sheet: alphadiversity
group	animalno	Flevel	Plevel	Flevel*Plevel	Feature	ACE	Chao1	Simpson	Shannon	PD_whole_tree	Coverage
CON	CON1	low	low	LFLP	334	436.455	406.067	0.902	5.2824	44.8013	0.9994
CON	CON2	low	low	LFLP	398	432.358	430.344	0.9749	6.4488	44.1295	0.9994
CON	CON3	low	low	LFLP	320	431.366	407	0.931	5.0939	47.1197	0.9992
CON	CON4	low	low	LFLP	399	418.688	453.375	0.9737	6.5211	51.368	0.9996
CON	CON5	low	low	LFLP	582	698.17	715.621	0.9827	6.7799	53.6836	0.998
CON	CON6	low	low	LFLP	671	712.027	714.784	0.9207	5.0219	62.0872	0.9988
HP	HP1	low	high	LFHP	736	745.879	748.083	0.9662	6.9085	66.276	0.9995
HP	HP2	low	high	LFHP	713	742.421	761.065	0.9729	6.3929	63.4234	0.9989
HP	HP3	low	high	LFHP	706	756.389	768.159	0.9801	6.8658	61.6048	0.9987
HP	HP4	low	high	LFHP	698	738.133	746.141	0.9812	6.7669	60.1123	0.9988
HP	HP5	low	high	LFHP	703	714.367	732	0.9822	7.5199	62.9305	0.9994
HP	HP6	low	high	LFHP	730	739.875	745.955	0.9685	7.2059	65.8789	0.9995
HF	HF1	high	low	HFLP	628	712.814	717.718	0.9277	4.9947	57.0964	0.9982
HF	HF2	high	low	HFLP	703	714.285	726.619	0.9341	6.689	62.5131	0.9994
HF	HF3	high	low	HFLP	646	729.607	722.421	0.9138	5.0412	61.5461	0.9982
HF	HF4	high	low	HFLP	695	739.923	738.5	0.9607	6.0279	60.9087	0.9987
HF	HF5	high	low	HFLP	633	711.264	717.038	0.885	5.0107	56.3662	0.9984
HF	HF6	high	low	HFLP	700	715.204	729.333	0.9851	7.6351	64.8478	0.9994
HPHF	HPHF1	high	high	HFHP	576	686.459	663.244	0.9607	5.7838	45.6173	0.9981
HPHF	HPHF2	high	high	HFHP	471	568.856	552.75	0.9107	4.6042	41.1761	0.9983
HPHF	HPHF3	high	high	HFHP	741	750.262	759.125	0.9625	6.7039	63.9618	0.9995
HPHF	HPHF4	high	high	HFHP	654	722.391	731.623	0.941	5.5073	57.5454	0.9985
HPHF	HPHF5	high	high	HFHP	667	738.124	746.692	0.9131	5.2547	63.5485	0.9984
HPHF	HPHF6	high	high	HFHP	718	730.09	737.091	0.8866	5.7667	65.2606	0.9995

## Sheet: genusabundance
group	animalno	Flevel	Plevel	Flevel*Plevel	unclassified_Muribaculaceae	unclassified_Lachnospiraceae	Helicobacter	unclassified_Oscillospiraceae	Alloprevotella	Staphylococcus	unclassified_Atopobiaceae	Bacillus	Faecalibaculum	Bacteroides	Others	Unknown
CON	CON1	low	low	LFLP	0.00640567	0.131485	0.0150377	0.0360514	3.90589e-05	0.300129	1.30196e-05	0.00506464	0.000156236	0.000130196	0.49916	0.00632755
CON	CON2	low	low	LFLP	0.0391028	0.216691	0.170107	0.103558	0.00757805	0.00788118	5.51131e-05	9.6448e-05	0.0107746	0.00739894	0.435297	0.0014605
CON	CON3	low	low	LFLP	0.158085	0.0134566	0.00133073	0.000855467	0.000556732	0.177245	9.50519e-05	0.00415512	0.129841	0.00386997	0.449283	0.061227
CON	CON4	low	low	LFLP	0.0859078	0.136074	0.0451737	0.0626951	0.0261636	0.116867	1.3174e-05	0.000632353	0.000803615	0.0120279	0.495949	0.0176927
CON	CON5	low	low	LFLP	0.047395	0.18735	0.0534116	0.15753	0.000770517	0.00040985	0.000213122	0.000967245	0.0275747	0.00701662	0.516001	0.0013607
CON	CON6	low	low	LFLP	0.0799667	0.0320194	0.0571743	0.00150068	0.000430887	0.000757767	0.000505178	0.0122431	0.173068	0.00404142	0.583273	0.0550198
HP	HP1	low	high	LFHP	0.0227203	0.168543	0.206351	0.063765	0.00125598	0.000933932	0.000128818	0.0247814	0.00177125	0.00880795	0.474405	0.0265366
HP	HP2	low	high	LFHP	0.365247	0.0229195	0.00368554	0.00227056	0.00116819	0.00167824	0.00019744	0.034733	0.0355885	0.00625226	0.463589	0.0626707
HP	HP3	low	high	LFHP	0.0934021	0.326593	0.0396921	0.103729	0.0494209	0.000537996	0.000373608	0.00506613	0.00221176	0.00656056	0.368423	0.00399014
HP	HP4	low	high	LFHP	0.249023	0.115027	0.0405362	0.0770903	0.00636846	0.000668764	0.000349581	0.00609487	0.00383019	0.0534251	0.444865	0.00272065
HP	HP5	low	high	LFHP	0.0238854	0.099189	0.0961524	0.0196267	0.00277737	0.00420308	0.000333284	0.0729336	0.00220338	0.0228485	0.644793	0.0110539
HP	HP6	low	high	LFHP	0.0593975	0.050033	0.176997	0.0139664	0.00651053	0.00319284	0.00128427	0.0748444	0.0107914	0.0182117	0.5489	0.0358704
HF	HF1	high	low	HFLP	0.277969	0.19001	0.153885	0.0274014	0.0734939	0.000713949	0.00796767	0.0042123	0.00504048	0.0218611	0.235289	0.00215613
HF	HF2	high	low	HFLP	0.0402425	0.0273772	0.260255	0.00879399	0.00629693	0.00410748	0.000832353	0.0857505	0.00332941	0.0206098	0.514177	0.0282276
HF	HF3	high	low	HFLP	0.385914	0.0273014	0.037423	0.00527106	0.0414326	0.000420484	0.209281	0.00552636	0.00169695	0.0493167	0.233098	0.00331882
HF	HF4	high	low	HFLP	0.230829	0.181944	0.13109	0.0655077	0.0171156	0.000567037	0.0531075	0.00661046	0.00477505	0.00661046	0.300366	0.00147728
HF	HF5	high	low	HFLP	0.146931	0.377196	0.0719735	0.0316723	0.106475	0.000633446	0.00647523	0.0040259	0.00470158	0.0273086	0.221523	0.0010839
HF	HF6	high	low	HFLP	0.14743	0.0265768	0.0204239	0.00784263	0.0229402	0.00510598	0.0167138	0.10447	0.00249789	0.0298645	0.599916	0.0162179
HPHF	HPHF1	high	high	HFHP	0.279032	0.109682	0.0769625	0.0199449	0.0833195	0.000466987	0.00503141	0.00165705	0.00593525	0.0599852	0.356823	0.00115994
HPHF	HPHF2	high	high	HFHP	0.316325	0.0890712	0.0123047	0.0185795	0.0730016	0.000703999	0.145697	0.000765216	0.00348939	0.0360264	0.303929	0.00010713
HPHF	HPHF3	high	high	HFHP	0.26026	0.0573872	0.134853	0.0174211	0.0271244	0.00142507	0.0326806	0.0398059	0.00473956	0.0210879	0.391142	0.0120731
HPHF	HPHF4	high	high	HFHP	0.317558	0.206128	0.0794229	0.0187254	0.0454823	0.000713914	0.0559233	0.00983119	0.0287053	0.00688629	0.227768	0.00285566
HPHF	HPHF5	high	high	HFHP	0.348709	0.32486	0.0520917	0.0320698	0.0135031	0.000567479	0.0282575	0.00372499	0.00104765	0.00561659	0.186366	0.00318661
HPHF	HPHF6	high	high	HFHP	0.177837	0.102097	0.35967	0.0161683	0.0257361	0.0017107	0.00492014	0.0246764	0.00216486	0.0129438	0.264386	0.00769056

## Sheet: familyabundance
group	animalno	Flevel	Plevel	Flevel*Plevel	Lachnospiraceae	Muribaculaceae	Helicobacteraceae	Oscillospiraceae	Prevotellaceae	Erysipelotrichaceae	Ruminococcaceae	Staphylococcaceae	Atopobiaceae	Rikenellaceae	Others	Unknown
CON	CON1	low	low	LFLP	0.266278	0.00716081	0.0150377	0.0478212	0.00196597	0.00248675	0.006627	0.317484	1.30196e-05	0.0129155	0.315883	0.00632755
CON	CON2	low	low	LFLP	0.363678	0.0412246	0.170107	0.152705	0.00763317	0.0124693	0.0300642	0.00811541	5.51131e-05	0.0483755	0.164113	0.0014605
CON	CON3	low	low	LFLP	0.020925	0.163897	0.00133073	0.00278366	0.00310955	0.17901	0.00126283	0.18527	9.50519e-05	0.0106051	0.370485	0.061227
CON	CON4	low	low	LFLP	0.262874	0.088648	0.0451737	0.0978961	0.0267301	0.00142279	0.0242797	0.124152	1.3174e-05	0.0598891	0.251228	0.0176927
CON	CON5	low	low	LFLP	0.361487	0.0510836	0.0534116	0.224663	0.00131152	0.0331814	0.0423948	0.00040985	0.000229516	0.0442146	0.186252	0.0013607
CON	CON6	low	low	LFLP	0.0412909	0.092923	0.0571743	0.00361054	0.0012778	0.203245	0.00676047	0.000757767	0.000698334	0.0139221	0.52332	0.0550198
HP	HP1	low	high	LFHP	0.324397	0.0239119	0.206351	0.0961789	0.00268908	0.00413829	0.0391446	0.00104665	0.000676296	0.0205787	0.254352	0.0265366
HP	HP2	low	high	LFHP	0.0331699	0.384958	0.00368554	0.00514989	0.00297805	0.0773635	0.012521	0.00171115	0.00069104	0.00500181	0.410099	0.0626707
HP	HP3	low	high	LFHP	0.437436	0.115968	0.0396921	0.132272	0.0504371	0.00376597	0.0283345	0.00055294	0.000418441	0.0480161	0.139117	0.00399014
HP	HP4	low	high	LFHP	0.196921	0.262809	0.0405362	0.101181	0.00766039	0.00535011	0.0319487	0.000668764	0.000425577	0.0716946	0.278084	0.00272065
HP	HP5	low	high	LFHP	0.221449	0.0259591	0.0961524	0.0316249	0.00831358	0.00835061	0.0368834	0.00433269	0.00122204	0.0133128	0.541346	0.0110539
HP	HP6	low	high	LFHP	0.0746303	0.0828354	0.176997	0.023866	0.0106309	0.0178192	0.0289317	0.00319284	0.0017302	0.0172128	0.526283	0.0358704
HF	HF1	high	low	HFLP	0.308369	0.279968	0.153885	0.0326703	0.0763354	0.00565448	0.0124798	0.000713949	0.00801051	0.014893	0.104865	0.00215613
HF	HF2	high	low	HFLP	0.0512802	0.0438795	0.260255	0.0140052	0.0117615	0.0115082	0.0282095	0.00410748	0.0026961	0.0097711	0.534298	0.0282276
HF	HF3	high	low	HFLP	0.0451719	0.388287	0.037423	0.00940081	0.0542274	0.00238775	0.0053011	0.000420484	0.209416	0.0289683	0.215678	0.00331882
HF	HF4	high	low	HFLP	0.211326	0.232918	0.13109	0.0944266	0.0187868	0.00926658	0.132791	0.000581959	0.0533164	0.00525256	0.108767	0.00147728
HF	HF5	high	low	HFLP	0.393032	0.150929	0.0719735	0.0615991	0.111233	0.00830518	0.0261261	0.000633446	0.00655968	0.0263936	0.142131	0.0010839
HF	HF6	high	low	HFLP	0.0516659	0.151894	0.0204239	0.0143812	0.0261544	0.00920178	0.0320134	0.00530801	0.0181832	0.0164383	0.638119	0.0162179
HPHF	HPHF1	high	high	HFHP	0.295979	0.283054	0.0769625	0.0334875	0.10096	0.0104545	0.0214965	0.000466987	0.00506154	0.0218128	0.149104	0.00115994
HPHF	HPHF2	high	high	HFHP	0.263433	0.319156	0.0123047	0.0320013	0.0791234	0.00410156	0.0129169	0.000703999	0.145697	0.0148299	0.115624	0.00010713
HPHF	HPHF3	high	high	HFHP	0.128064	0.262854	0.134853	0.0258755	0.0319921	0.0112725	0.0273326	0.00142507	0.033273	0.0111924	0.319792	0.0120731
HPHF	HPHF4	high	high	HFHP	0.216613	0.324682	0.0794229	0.0289135	0.0496616	0.0691455	0.0352346	0.000713914	0.0559679	0.013371	0.123418	0.00285566
HPHF	HPHF5	high	high	HFHP	0.346541	0.350804	0.0520917	0.0464605	0.0146963	0.0182903	0.0365515	0.000567479	0.0283449	0.010753	0.0917134	0.00318661
HPHF	HPHF6	high	high	HFHP	0.150057	0.179699	0.35967	0.0262963	0.0322761	0.015472	0.0201953	0.0017107	0.0052532	0.0115661	0.190114	0.00769056

[truncated: 2 more sheets: phylum, PAS glycogen analysis]
