# Supplementary material for: High-protein high-konjac glucomannan diets changed glucose and lipid metabolism by modulating colonic microflora and bile acid profiles in healthy mouse models
Source: Royal Society of Chemistry journal article supplement (doi:10.1039/d4fo00159a), 2024-01-01
Supplement: d4fo00159a2.pdf [file d4fo00159a2.pdf]

**Table S1.** The ingredient composition of diets for the CON, HP, HF and HPHF groups.

| Item                | CON   |       | HP    |       | HF    |        | HPHF  |       |
|---------------------|-------|-------|-------|-------|-------|--------|-------|-------|
|                     | gm%   | kcal% | gm%   | kcal% | gm%   | kcal%  | gm%   | kcal% |
| Protein             | 20    | 20    | 40    | 40    | 18    | 20     | 35    | 40    |
| Carbohydrate        | 64    | 64    | 44    | 44    | 56    | 64     | 39    | 44    |
| Fat                 | 7     | 16    | 7     | 16    | 6     | 16     | 6     | 16    |
| Total               |       | 100   |       | 100   |       | 100    |       | 100   |
| kcal/gm             | 4.01  |       | 4.01  |       | 3.52  |        | 3.52  |       |
| Ingredient          | gm    | kcal  | gm    | kcal  | gm    | kcal   | gm    | kcal  |
| Casein              | 122   | 488   | 246   | 984   | 121   | 484    | 245   | 980   |
| L-Cystine           | 3     | 12    | 3     | 12    | 3     | 12     | 3     | 12    |
| Soy isolate         | 80    | 320   | 160   | 640   | 80    | 320    | 160   | 640   |
| Corn starch         | 412.5 | 1650  | 208.5 | 834   | 407.7 | 1630.8 | 203.7 | 814.8 |
| Maltodextrin 10     | 132   | 528   | 132   | 528   | 132   | 528    | 132   | 528   |
| Sucrose             | 100   | 400   | 100   | 400   | 100   | 400    | 100   | 400   |
| Cellulose           | 50    | 0     | 50    | 0     | 50    | 0      | 50    | 0     |
| Konjac powder       | 0     | 0     | 0     | 0     | 150   | 22.8   | 150   | 22.8  |
| Soybean oil         | 73    | 657   | 73    | 657   | 73    | 657    | 73    | 657   |
| Vitamin mix V10037  | 10    | 40    | 10    | 40    | 10    | 40     | 10    | 40    |
| Mineral mix S10022G | 35    | 0     | 35    | 0     | 35    | 0      | 35    | 0     |
| Choline Bitartrate  | 2.5   | 0     | 2.5   | 0     | 2.5   | 0      | 2.5   | 0     |

**Table S2.** Paired primers for qPCR.

| Gene               | Primer sequence (5'-3') |                        |
|--------------------|-------------------------|------------------------|
|                    | Forward                 | Reverse                |
| <i>Fasn</i>        | CTGACTCGGCTACTGACACG    | GGTGGTGGGAACCCTCAATGG  |
| <i>Srebf1</i>      | TTACCCCTCCACCCTCAGAC    | CTGGGCTTTGACCTGGCTAT   |
| <i>Ppar-γ</i>      | GCTCCAAGAATACCAAAGTGCG  | TTTATCCCCACAGACTCGGC   |
| <i>Fxr (Nr1h4)</i> | AGATGGGGATGTTGGCTGAA    | GCCGTGAGTTCCGTTTTCTC   |
| <i>Shp (Nr0b2)</i> | GATGACTCCCCAAACCTCCAG   | GGTCCTTCCACAAGCAACTAC  |
| <i>Foxo1</i>       | TCAACCTTCTCTCGTCCCA     | TAGACTGGTGTGTTGGCGGTG  |
| <i>Cox2</i>        | CTCAACTTTACTGGGGTTTTTCC | GAGGTGGATTTTGGGATGGT   |
| <i>Tnf-α</i>       | CGTCGTAGCAAACCACCAAG    | GAGAACCTGGGAGTAGACAAGG |
| <i>Tlr4</i>        | CTCCAGTCGGTCAGCAAACG    | AGAGGAAGTGAGAGTGCCAAC  |
| <i>Gapdh</i>       | TGTGTCCGTCGTGGATCTGA    | TTGCTGTTGAAGTCGCAGGAG  |

FASN, fatty acid synthase; Srebf1, sterol regulatory element binding transcription factor 1; PPAR-γ, peroxisome proliferator activated receptor gamma; FXR, farnesoid X receptor; SHP, nuclear receptor subfamily 0, group B, member 2; FOXO1, forkhead box O1; COX2, cyclooxygenase-2; TNF-α, tumor necrosis factor-alpha; TLR4, toll-like receptor 4; GAPDH, glyceraldehyde 3-phosphate dehydrogenase.

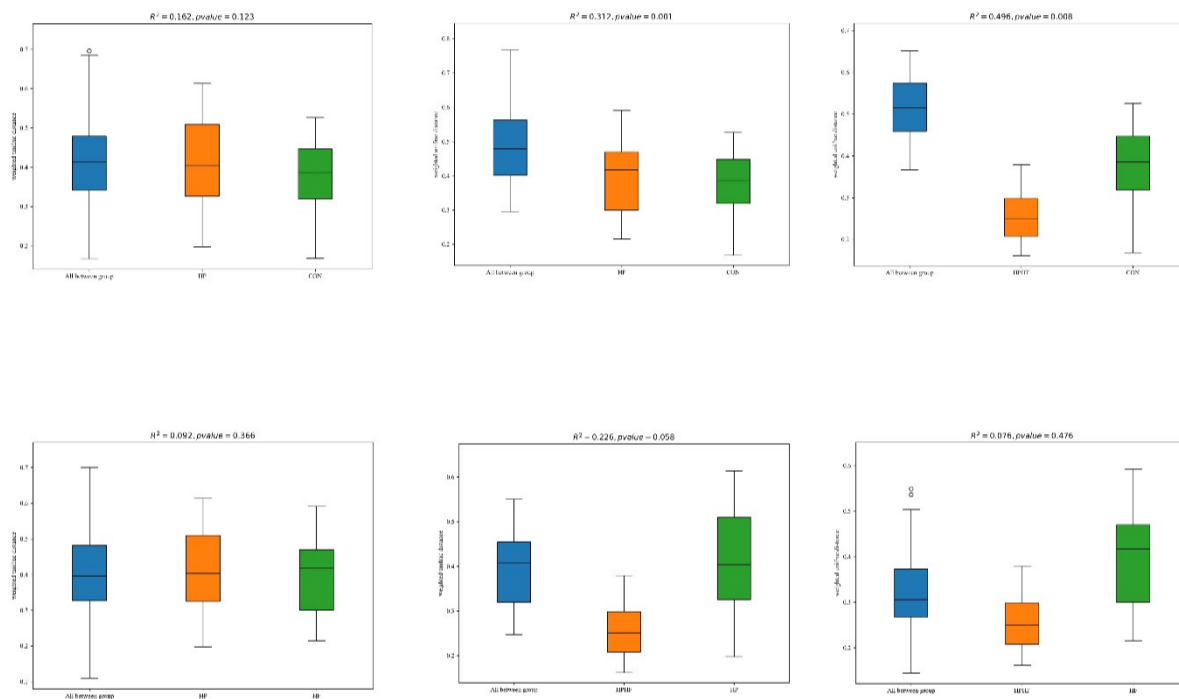

**Figure S1.** Beta diversity of colonic microbiota in mice. Weighted unifracc distance metrics based on PERMANOVA was used for analysing beta diversity of gut microbial communities in different groups. CON, control diet; HP, high protein diets; HF, high fiber diets; HPHF, high protein and high fiber diets. Data are presented as mean  $\pm$  SEM.

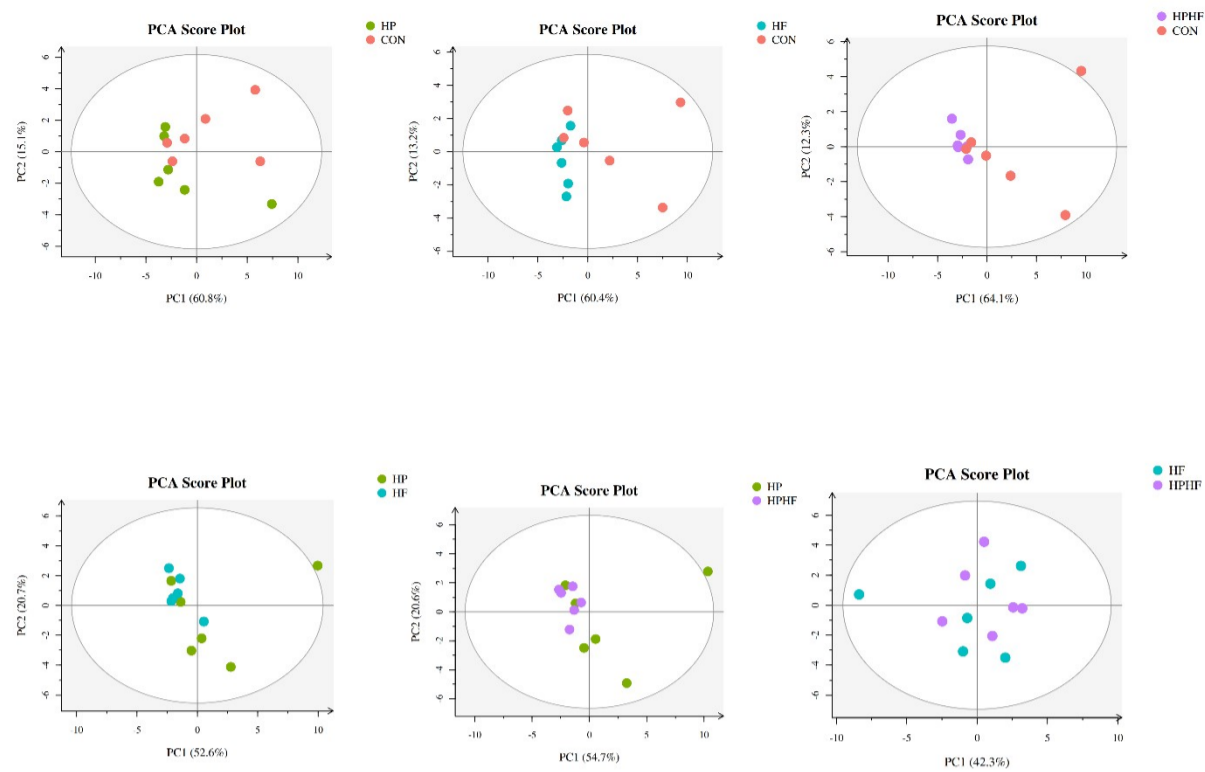

Figure S2. Principal component analysis (PCA) showed the clustering of colonic bile acids of mice. CON, control diet; HP, high protein diets; HF, high fiber diets; HPHF, high protein and high fiber diets.

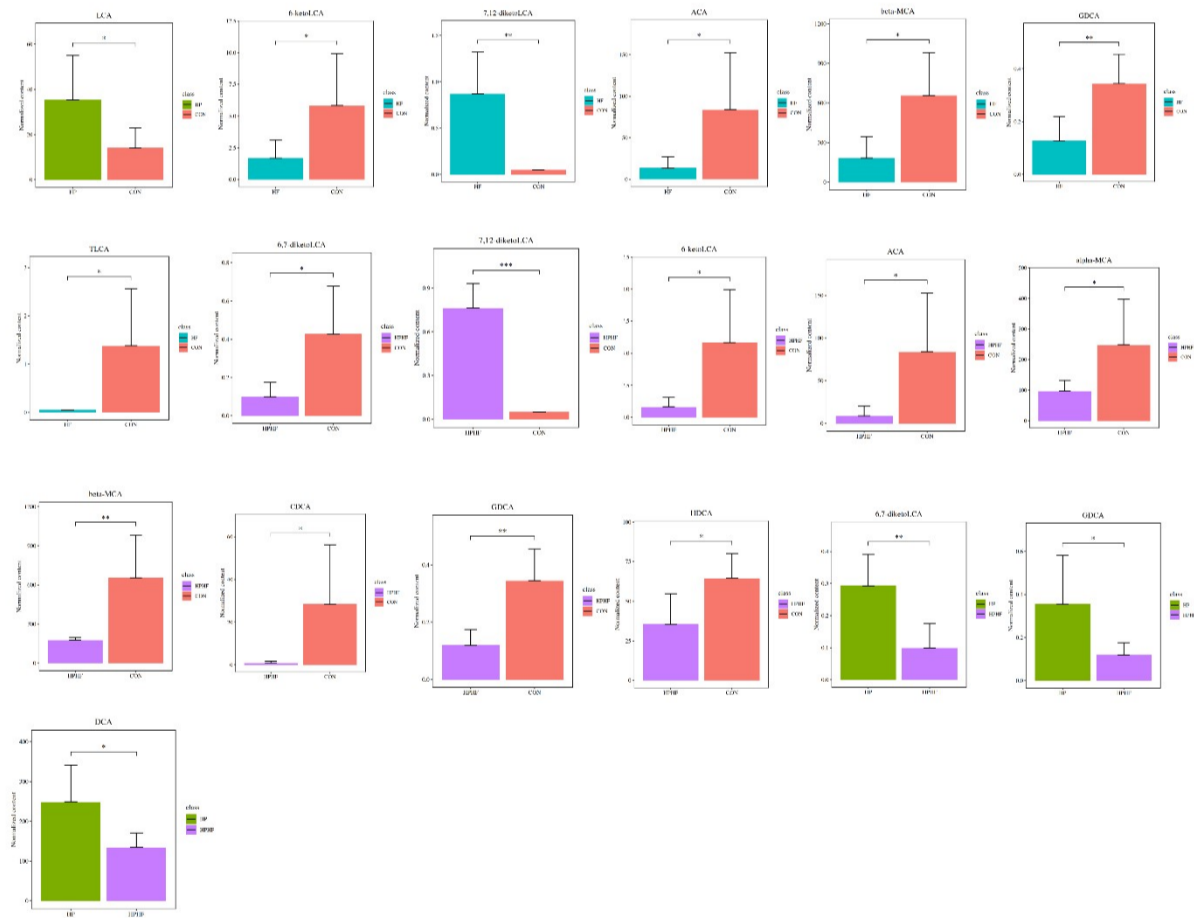

Figure S3. Significant changes in colonic bile acids between two dietary groups of mice. CON, control diet; HP, high protein diets; HF, high fiber diets; HPHF, high protein and high fiber diets. Data are presented as mean  $\pm$  SEM. Significant changes were marked by \* $P < 0.05$ , and \*\* $P < 0.01$ .
